# Supplementary material
Source: publisher figshare collection journal article supplement (https://gsajournals.figshare.com/ndownloader/files/24121475)
Supplement: Supplementary file 1 [file 24121475]

## Sheet: Correlation to low expression
Human orthologue	Disease-free Surivival (at least for 60 months)		Cox Hazard Ratio analysis
	LogRank_Survival	Differences in survival %	Wald Test	Hazard Ratio
ESR1	6.40625e-21	24.2003	1.42012e-18	4.20399
CYB5D2	8.94336e-14	22.6878	2.7417e-12	4.84105
IGF1R	4.94043e-15	21.5585	9.72745e-14	3.71245
RABEP1	1.90462e-13	21.049	2.85889e-12	4.06528
LRP2	1.95861e-11	20.844	1.53768e-10	3.79137
ABHD14A	2.51594e-14	20.7957	3.50988e-13	3.39895
SRPK2	5.42235e-11	20.5042	5.14799e-10	4.11007
NT5DC1	2.51601e-13	20.3977	2.43944e-12	3.22264
STAT5B	1.53612e-10	20.0102	1.15083e-09	3.94618
HEXIM2	6.81302e-11	19.5765	4.03907e-10	3.51917
C5	4.89973e-14	19.5671	5.68937e-13	3.02189
PHF7	6.85367e-10	19.348	3.97822e-09	3.7335
RERG	1.1556e-11	19.3167	7.79479e-11	3.43775
PEX11G	5.41695e-10	19.0455	2.65496e-09	3.49279
DYNLRB2	1.07276e-09	18.6265	4.98485e-09	3.49619
SKP1	6.32465e-12	18.4452	3.86987e-11	2.95798
GLUD1	5.84004e-10	18.4402	2.9192e-09	3.54231
PGR	4.22846e-09	18.2461	1.88956e-08	3.53767
SFXN2	8.70729e-10	18.0527	3.29432e-09	3.07444
ABCC8	1.17331e-08	17.7264	5.40409e-08	3.61305
ANKRA2	6.46577e-09	17.5552	1.95973e-08	2.94959
BTD	3.02266e-08	17.2853	1.0914e-07	3.38741
TUBG2	2.73882e-08	17.2092	8.18298e-08	3.13088
SEPSECS	1.30733e-09	17.0915	4.31945e-09	2.75591
DACH1	2.80282e-08	16.8308	7.5955e-08	2.95262
SLC7A8	8.16711e-10	16.7367	2.78575e-09	2.67886
CYBRD1	1.51862e-07	16.6593	5.98772e-07	3.41852
RPGR	3.78276e-09	16.323	1.08891e-08	2.5583
WDR78	2.28385e-07	16.2767	8.18377e-07	3.30498
RAPGEF3	6.54252e-11	16.259	2.87454e-10	2.44609
HDAC11	3.94642e-08	16.1264	9.58073e-08	2.71622
ANKHD1	6.06559e-09	16.0903	1.67814e-08	2.56852
NEDD4L	2.03127e-08	15.8909	5.20213e-08	2.71243
SFXN5	2.36538e-07	15.7496	7.85191e-07	3.26733
NMNAT3	5.45241e-07	15.6492	1.10305e-06	2.69531
ELOVL2	2.41912e-07	15.4606	8.92141e-07	3.29371
CES4A	2.60819e-07	15.3657	5.22457e-07	2.50556
DNAH7	2.0129e-06	15.1281	4.17171e-06	2.8497
TBX3	7.71586e-07	15.0697	1.4561e-06	2.56513
OPRL1	1.1668e-06	15.019	2.13341e-06	2.54456
YPEL3	2.05931e-06	14.9698	4.28353e-06	2.84335
IGBP1	4.44718e-06	14.9107	8.00572e-06	2.66085
NINJ1	4.3208e-07	14.5614	8.10587e-07	2.32491
ELOVL5	3.18264e-06	14.4995	7.67008e-06	2.89759
CYP4F22	3.8381e-06	14.273	6.7961e-06	2.61458
SLTM	8.51357e-06	14.2481	1.58061e-05	2.71719
SLC22A5	3.4429e-07	14.0519	6.66505e-07	2.42398
GDAP1	2.09384e-05	14.0106	3.5897e-05	2.58535
RASL11B	5.31359e-06	13.8774	8.62153e-06	2.42768
NPEPPS	9.65564e-06	13.8248	1.49933e-05	2.37507
RHBDL1	7.42586e-06	13.5897	1.14851e-05	2.28708
LRRC6	1.99507e-06	13.5266	3.3686e-06	2.31634
COL4A6	4.62005e-05	13.4061	6.60614e-05	2.33031
SLC22A4	8.36822e-06	13.2481	1.28011e-05	2.26129
TMEM30B	5.40528e-06	13.2442	8.48294e-06	2.25755
CYP4V2	2.13495e-05	13.2239	3.11766e-05	2.28907
SCRN2	5.68228e-07	13.2195	1.03225e-06	2.14115
PPP2R2A	6.72207e-06	13.0055	1.03575e-05	2.21881
NHLRC3	5.37638e-05	12.9106	7.34012e-05	2.17607
RHOBTB2	9.14609e-05	12.8064	0.000127683	2.31026
COL4A5	5.50227e-05	12.7599	7.72311e-05	2.29631
ATP6AP1L	4.01923e-06	12.746	6.36872e-06	2.16214
RNF167	7.35261e-05	12.7104	9.93801e-05	2.19074
RPH3AL	2.49332e-05	12.6779	3.57727e-05	2.23297
TEKT3	8.35028e-05	12.5083	0.000129459	2.40453
STAT3	0.000246401	12.491	0.000316653	2.17063
PJA2	9.08329e-05	12.4146	0.00012814	2.33767
HINT2	7.04247e-05	12.3819	9.36499e-05	2.07561
FAM172A	6.09119e-05	12.3693	8.2161e-05	2.13275
KLHL9	1.49361e-05	12.2935	2.1545e-05	1.99253
MYOF	0.000120772	12.2247	0.000180734	2.37189
NUCB2	0.000266397	12.1499	0.000346137	2.20434
DTWD1	8.2167e-05	12.1277	0.00013463	2.37429
NUDT6	2.10232e-05	12.0801	2.97387e-05	1.97626
GSTT2B	4.00833e-05	12.0763	5.48687e-05	2.05224
PHF11	3.0546e-05	12.0738	4.2286e-05	1.9978
GNB5	0.000290239	11.901	0.000366104	2.12012
PRICKLE2	0.000257918	11.8996	0.000326045	2.11402
NR3C1	0.000245681	11.8128	0.000338333	2.26695
LRRC29	0.000331079	11.7786	0.000417338	2.13165
PKP4	0.000288941	11.7296	0.000400101	2.25505
DOC2A	0.000339954	11.5542	0.00042704	2.11849
RERE	0.000237034	11.5231	0.000295982	2.00336
TBC1D17	5.19376e-05	11.4782	6.9704e-05	1.96944
ADCY4	0.000634119	11.2795	0.000785056	2.12138
PARK7	0.00102092	11.2567	0.00119321	1.91799
RGS11	5.66254e-05	11.1576	7.5718e-05	1.96859
ACO1	0.00166979	11.1336	0.00193334	1.9539
STAT5A	0.000155929	11.0965	0.000197013	1.87774
MTMR11	0.00142803	11.0863	0.00166013	1.95511
TMEM30A	0.00150494	10.9136	0.00174822	1.96227
SLC7A9	0.000739544	10.8877	0.000951475	2.13914
EIF4B	0.000884114	10.862	0.00105246	2.01618
RMND1	8.93214e-05	10.6943	0.000116389	1.85247
CYP4B1	0.000697499	10.6574	0.000828212	1.93338
PEBP4	0.000692175	10.5826	0.000917951	2.08486
LRRC4C	0.00106571	10.5526	0.00126322	2.01132
AR	0.000127969	10.5276	0.000163896	1.92964
MTMR9	0.000634027	10.4629	0.000755966	1.93571
ATP6V0A1	0.00013684	10.3549	0.000174068	1.85585
YPEL5	0.00106691	10.3409	0.00123858	1.85323
ERBB3	0.000387659	10.3383	0.000469331	1.83667
MYO1C	0.0012482	10.2843	0.00154234	2.07052
CYP4X1	0.00221709	10.274	0.00261818	1.99261
MEAF6	0.00227841	10.272	0.00261097	1.94404
CTH	0.00200864	10.1764	0.00227367	1.79175
TEF	0.001807	10.1738	0.00207153	1.90788
DBP	0.00228282	10.0891	0.00269709	1.98568
SH3BGRL	0.00221842	10.0859	0.00253647	1.92912
TLR10	0.000393296	10.034	0.000475185	1.76977
FBXL14	0.0025756	9.97889	0.00290946	1.87225
ATP1A2	0.000852729	9.91971	0.00110823	2.03193
PI15	0.00515222	9.91479	0.00583172	1.88699
TMEM53	0.00625845	9.89954	0.00687561	1.83024
TAPT1	0.00200865	9.87297	0.00228304	1.85873
SFXN3	0.00522839	9.79778	0.0057909	1.85045
C4A	0.00549853	9.77632	0.00615294	1.88595
DNAJC7	0.00202864	9.70264	0.00229031	1.74504
KLHL10	0.000999694	9.65932	0.00116318	1.82042
PTEN	0.000470697	9.59369	0.000565486	1.79726
TSC1	0.00135061	9.57254	0.0015486	1.77637
ATP1A4	0.00281923	9.52255	0.0033401	1.9381
GDF10	0.00275038	9.46108	0.0032714	1.92643
PLIN1	0.00434735	9.42079	0.00479013	1.76412
GABARAP	0.00351649	9.40724	0.00414595	1.89096
SNAP23	0.0123835	9.30869	0.0132748	1.74643
DNAH6	0.00240985	9.16928	0.00288258	1.95434
RAPGEF4	0.01162	9.13576	0.0125841	1.78629
SPR	0.00611095	9.10534	0.00671407	1.82674
DNAH1	0.00549058	9.10103	0.00617303	1.87574
MSRA	0.00947092	9.04815	0.0104534	1.81491
TGFB3	0.00773783	9.03179	0.00842935	1.79993
GLYR1	0.00388721	9.00766	0.00430285	1.77264
STUB1	0.00169891	9.00518	0.00193051	1.71831
KLHL3	0.00823398	8.96339	0.00898734	1.81459
TXNIP	0.0112053	8.92039	0.0119914	1.7003
MYT1	0.00514653	8.9091	0.00569277	1.84227
TP63	0.0137384	8.89586	0.0148443	1.77065
CYP4F12	0.00619887	8.87736	0.00676998	1.78786
CXXC1	0.00500292	8.86006	0.00547475	1.68932
PARVA	0.00478025	8.70879	0.00524838	1.70134
PGM5	0.00701566	8.42127	0.00760423	1.66552
SLC1A2	0.020235	8.40383	0.0214926	1.71731
HSF4	0.0249674	8.34851	0.0262253	1.66624
PHPT1	0.00762006	8.3379	0.0082375	1.6559
KIAA0930	0.026759	8.24568	0.0281789	1.68028
PIGQ	0.0109788	8.21917	0.0117508	1.69311
ACER2	0.0179863	8.18974	0.0191138	1.72149
SLC1A4	0.0132413	8.17981	0.0141172	1.70757
CYB5A	0.0350485	8.15316	0.036616	1.64747
ABHD13	0.0324935	8.10642	0.0339562	1.64515
BAIAP2	0.0168647	8.00887	0.0179675	1.73002
STAT6	0.0207213	7.98236	0.0218173	1.65044
SCRN3	0.0254516	7.92135	0.0270278	1.68357
AKR1C3	0.0202298	7.8497	0.0212641	1.5372
NKTR	0.0178508	7.69443	0.0188276	1.63942
QSOX1	0.00822598	7.69073	0.0088681	1.55293
ATP1B1	0.0353389	7.66887	0.0368234	1.62837
ARHGEF17	0.0214896	7.66195	0.022677	1.68294
CMTM6	0.0318997	7.65474	0.033435	1.6553
ANK2	0.0327107	7.60725	0.0340788	1.6177
LSAMP	0.0286369	7.59494	0.0303714	1.6463
KLHL22	0.0272712	7.54744	0.0284894	1.58628
LEPROTL1	0.0412591	7.44708	0.0427152	1.55217
L3MBTL1	0.0326571	7.43047	0.0340286	1.62943
PAOX	0.0254132	7.39524	0.0266024	1.584
SNAP25	0.0427021	7.38672	0.0442722	1.59553
CDIPT	0.0316235	7.37394	0.0330469	1.64232
GSS	0.0265132	7.3733	0.0279819	1.68179
MNT	0.0429042	7.2837	0.0444203	1.59099
ACOX2	0.0365136	7.23227	0.0378875	1.56979
ZDHHC1	0.0173651	7.18976	0.0188229	1.64687
CEP290	0.0368079	7.13	0.0383133	1.62878
ELF1	0.0454519	7.09189	0.0469695	1.56199
CYP4F11	0.0284209	7.07052	0.0301281	1.64301
FRMD6	0.0221838	7.00642	0.0232792	1.58186
PEBP1	0.0368522	7.0063	0.0382166	1.5368
EIF2D	0.0288537	6.9606	0.0300814	1.46979
ITCH	0.0312192	6.84945	0.0324923	1.57735
ATRN	0.0281541	6.82153	0.029398	1.55683
ARF3	0.0216856	6.81002	0.022766	1.56033
MAK	0.030927	6.77198	0.0327082	1.60678
KLHL26	0.0401238	6.6654	0.0415352	1.52175
SLC22A17	0.0402924	6.59767	0.0422595	1.60202
NTN5	0.0406332	6.42084	0.0426273	1.58129
NUDT14	0.0465551	6.11048	0.0480959	1.44269

## Sheet: Correlation to High Expression
	Disease-free Surivival (at least for 60 months)
gene	LogRank_Survival	Differences in survival %	Hazard Ratio	Wald Test
ABCC4	0.000671217	-9.40802	0.574107	0.000792468
ACER3	0.0317474	-7.03477	0.67967	0.0329941
ACPP	0.00196517	-9.75954	0.571299	0.00222635
ACTN1	0.00785315	-8.29333	0.626727	0.00846542
ACTN4	0.0168027	-7.64328	0.650366	0.0177406
ACTR5	2.44981e-05	-13.8373	0.406292	3.77584e-05
ADAM17	0.000129858	-12.0022	0.468932	0.000169343
ADCY7	0.000358593	-11.982	0.449496	0.00047957
AHSA1	1.9101e-06	-14.1027	0.424698	3.24759e-06
AKR1B15	0.000767692	-9.76466	0.550364	0.000902006
AKR1E2	0.00101931	-9.22789	0.556338	0.00118296
ALS2	0.0422693	-7.39878	0.642287	0.0437366
ANLN	2.625e-16	-23.8899	0.203811	1.58987e-14
ANP32B	6.23752e-05	-12.2391	0.46799	8.42221e-05
AQP5	0.000239972	-10.7755	0.516863	0.000298027
AQP6	0.0154359	-7.86769	0.60074	0.0163713
ARF1	0.000101384215224471	-12.6464	0.45205	0.000135883
ARHGAP10	0.000181473	-12.1893	0.46139	0.000235431
ARHGAP42	0.01035	-8.61514	0.557375	0.0113719
ARRDC3	0.0219227	-6.95192	0.650414	0.0229987
ATP1B3	0.000305212	-11.7442	0.475322	0.000382807
ATP6V0A4	5.08866e-05	-13.0314	0.431353	7.22372e-05
BAIAP2L1	1.41043e-05	-12.9724	0.447619	2.08728e-05
BTBD3	1.50957e-05	-11.3474	0.527699	2.17952e-05
C6orf106	0.0112018	-8.68475	0.561424	0.0123149
CASK	0.0260776	-8.08744	0.59162	0.0275411
CCT3	0.00126076	-10.3615	0.51761	0.00146456
CCT8	0.0415851	-6.10764	0.686309	0.0429821
CDK12	5.16561e-06	-14.0164	0.418294	8.32468e-06
CEL	1.36989e-05	-12.9164	0.464724	2.00988e-05
CHRNA1	0.00562818	-9.25849	0.588567	0.00613935
CHRNA5	3.89351e-09	-14.5368	0.433193	1.10242e-08
COL4A1	4.11106e-05	-13.6614	0.400362	6.52188e-05
CPAMD8	0.0232792	-7.4706	0.629269	0.0244102
CSNK2B	0.00417762	-8.85138	0.582876	0.00459954
CYB5B	0.0144543	-8.39558	0.569342	0.0155062
DDX31	6.21451e-05	-12.4738	0.47035	8.3831e-05
DENND1A	3.19703e-06	-14.8146	0.399945	5.43871e-06
DMRT1	0.0123691	-8.39439	0.584702	0.0132101
DMRTA1	0.00463002	-8.62134	0.59297	0.00507729
DNAI2	0.0437625	-7.67355	0.622038	0.0453932
DYSF	2.59792e-05	-13.7754	0.393251	4.26055e-05
ECE2	1.62837e-12	-20.3338	0.2758	1.48792e-11
EFNA2	0.00120511	-9.86709	0.546671	0.00139282
EFNA4	0.00974075	-8.34318	0.587705	0.0104698
EHMT2	0.0109701	-9.04219	0.557833	0.0119183
ELF4	0.00168771	-9.80979	0.553236	0.00192532
ELOVL1	0.0272373	-7.06082	0.618562	0.0284848
ENPEP	0.0379815	-7.78148	0.616946	0.0394922
ESRRA	0.000130875	-12.0856	0.458992	0.000172
FANCD2	7.43099e-09	-17.8149	0.308804	2.55427e-08
FBXO28	2.18413e-05	-11.8748	0.487257	3.09152e-05
FCN3	0.000126162	-11.9	0.424017	0.000184186
GABPB1	5.16088e-09	-18.2288	0.269703	2.70222e-08
GGCT	5.1908e-05	-11.6271	0.496063	6.99129e-05
GLIPR2	0.00541546	-9.15935	0.563043	0.00593484
GLYATL2	1.62777e-13	-21.2247	0.261364	2.15597e-12
GLYATL3	0.020465	-8.54016	0.588023	0.0216578
GNB4	0.000465384	-10.6928	0.51742	0.000561636
GRINA	0.0428649	-8.03023	0.616763	0.0445695
GSK3B	5.33005e-09	-17.6938	0.322336	1.76065e-08
HDGF	6.18254e-06	-12.7878	0.459691	9.52677e-06
HENMT1	0.00018861	-11.0071	0.498967	0.000238283
HSD17B10	0.00816639	-8.67212	0.56228	0.00885844
HSF1	0.00153716	-10.7461	0.51182	0.00178129
HSF2	0.0278175	-6.6425	0.652435	0.0290324
HSPD1	1.68026e-05	-11.9836	0.506871	2.40777e-05
IDH1	0.0186829	-7.27697	0.634365	0.0196954
IDH2	2.73244e-06	-14.2477	0.409366	4.62085e-06
IFI30	6.19469e-08	-17.312	0.308517	1.96097e-07
INTS8	0.00352273	-9.48451	0.562497	0.00390558
IREB2	0.00764474	-9.23716	0.566884	0.00830547
KCNG1	2.44087e-10	-18.3703	0.310909	1.09967e-09
KCNS1	0.00225073	-9.69847	0.552484	0.00253759
KDM1A	7.71494e-06	-12.8901	0.467541	1.16878e-05
KIF14	1.58013e-11	-20.8672	0.215799	2.71596e-10
KIF2A	0.00725795	-8.02157	0.616571	0.00785164
KIF2C	1.83593e-13	-22.644	0.2037	5.40494e-12
KLHL15	0.0344567	-7.8124	0.60812	0.036019
KLHL36	1.765e-07	-16.324	0.316653	4.94399e-07
KRAS	0.000559964	-11.2695	0.521463	0.000669127
KTI12	0.00406891	-7.92807	0.624051	0.00448447
LARP1	9.60684e-05	-13.0984	0.415535	0.000143317
LCT	2.18889e-08	-14.1466	0.445985	5.22852e-08
LIN9	5.57386e-05	-12.7156	0.431737	7.85422e-05
LPIN1	0.0168501	-7.52317	0.629203	0.0178031
LRP8	1.26689e-11	-20.3924	0.254624	1.12019e-10
MAP4K2	0.0219754	-8.34142	0.599008	0.0231381
MCM10	1.73553e-14	-23.4921	0.189409	8.87563e-13
MLF1	0.033744	-7.00551	0.633778	0.0350692
MLF2	0.015528	-8.86386	0.571042	0.0166277
MON1B	0.00658115	-9.45067	0.562127	0.00718346
MTHFSD	0.00764997	-8.27592	0.621493	0.00825823
MYO1B	0.0103103	-9.22352	0.559705	0.0111642
MYO1E	0.00206023	-9.04796	0.569647	0.00232587
NDUFA4L2	0.00780885	-9.46093	0.557663	0.00849525
NRAS	0.00125286	-9.60129	0.550192	0.00144553
NT5E	0.0239495	-7.6625	0.593794	0.0252393
NUP54	0.0297642	-7.39967	0.601727	0.0312373
PAX9	0.0161851	-8.92113	0.574747	0.0172796
PBK	5.3072e-05	-13.0375	0.423327	7.63534e-05
PCNA	0.001908	-10.0821	0.532044	0.00217437
PHGDH	7.15488e-13	-18.9586	0.325065	5.88753e-12
PKP1	4.05156e-07	-15.085	0.388547	7.99175e-07
PLCG1	4.2747e-05	-13.1965	0.451736	5.9388e-05
PLEKHM3	0.0473931	-7.20091	0.625724	0.0493454
PLIN2	2.38833e-10	-18.7107	0.286765	1.24217e-09
PLP2	0.025174	-8.19131	0.603027	0.026408
PPIAL4A	0.012924	-8.33659	0.589373	0.013782
PPP2R5C	0.000111385659810183	-11.3926	0.507123	0.000143963
PPP2R5D	0.00300167	-10.4212	0.519009	0.00340877
PRKX	3.34622e-07	-15.588	0.370464	6.95266e-07
PSAT1	9.7989546992726e-14	-20.3159	0.297554	1.12431e-12
PSMA5	0.000526989	-10.9268	0.493684	0.000639067
PSMB2	1.39175e-06	-12.6767	0.468591	2.37264e-06
PSMB4	0.000184539	-11.7466	0.472874	0.000236281
PSMG3	0.00122817	-9.32757	0.561443	0.00141688
PTPN11	0.00726831	-9.15653	0.543345	0.00815646
PWP1	5.00901e-05	-12.3048	0.463448	6.84717e-05
QSOX2	0.00491673	-9.12146	0.535077	0.00563978
RAP2A	0.000333014	-10.3067	0.535233	0.000406701
RASAL1	8.04748e-10	-18.2095	0.312289	3.22473e-09
RASD2	0.00566345	-8.07143	0.599715	0.00617007
RCAN1	0.00851257	-7.71696	0.590992	0.00917921
RCAN3	0.000900438	-8.89354	0.562171	0.0010519
REN	0.0156387	-8.68177	0.571986	0.0167754
RNF26	0.00126172	-9.34332	0.567405	0.00145255
RPIA	0.00335029	-8.73547	0.569559	0.00372425
RPL34	0.00125455	-10.3334	0.518135	0.00145706
RPL39L	0.00153067	-8.6229	0.592302	0.00174688
RRAS2	0.000838457	-9.66988	0.544495	0.000981344
RRBP1	0.00288488	-10.409	0.52634	0.00326184
RUVBL2	0.00891649	-9.25971	0.575233	0.00961715
SBNO2	0.0262903	-8.32926	0.602778	0.0275608
SCPEP1	0.00964862	-8.43842	0.553493	0.0106256
SDC1	0.000233324	-12.3744	0.436164	0.000318073
SENP5	3.06415e-08	-16.8757	0.346797	8.02739e-08
SFT2D2	4.08479e-05	-12.0863	0.457137	5.6654e-05
SH3BGRL3	0.00230892	-10.5199	0.505557	0.00267777
SLC1A3	0.00135945	-10.4027	0.492362	0.00168966
SLC1A5	8.29872e-05	-13.0692	0.426902	0.000117847
SLC25A5	3.28638e-07	-13.8217	0.437684	6.29506e-07
SLC30A3	0.000113927559437303	-12.3505	0.419552	0.000174824
SLC36A1	0.000993254	-11.2014	0.482789	0.00120166
SLC36A4	0.0366532	-7.24721	0.610144	0.0382718
SLC4A1AP	0.00998095	-8.72116	0.567412	0.0107647
SLC5A6	1.38935e-11	-18.6677	0.333546	7.83424e-11
SLC7A5	3.17098e-13	-22.3505	0.205724	8.35647e-12
SLC7A6	0.0190422	-8.28926	0.59619	0.0201306
SLC7A7	0.0385017	-6.43501	0.646033	0.04051
SLC9A6	0.000169953	-9.9688	0.56204	0.000213875
SMARCB1	0.000104379805834164	-11.6529	0.487037	0.000135944
SMOX	5.27122e-08	-16.2806	0.363308	1.26097e-07
SMTN	8.92763e-05	-11.9701	0.492833	0.000116777
SPIRE2	0.0385555	-8.2407	0.620943	0.0400602
SRC	0.000391301	-12.0038	0.454211	0.000506672
SRPK1	6.15345e-10	-17.9416	0.313613	2.50224e-09
SRPK3	0.00536192	-9.60538	0.557221	0.00588985
STAT1	0.0054055	-9.5245	0.531759	0.00614406
STK3	0.000112026569628099	-11.8348	0.488262	0.000145205
TAGLN2	7.74813e-05	-12.3615	0.419063	0.000112776
TBX1	0.0108299	-8.14364	0.571103	0.0119656
TFPI	0.0148198	-8.2359	0.602766	0.0157301
TGFB2	0.0345689	-7.07522	0.6277	0.0359076
TKT	0.000132669	-11.576	0.484383	0.000171125
TMBIM1	0.00859036	-8.18969	0.598842	0.00925627
TRIP10	0.0205279	-8.30055	0.584226	0.0217925
TSTA3	1.53481e-05	-13.0991	0.47072	2.22614e-05
TTLL12	0.00962679	-8.46322	0.563914	0.010711
UBQLN1	7.93176e-07	-14.9296	0.376914	1.54374e-06
UBQLN4	0.00384484	-10.1606	0.536237	0.00429039
UCK2	1.32005e-14	-23.4397	0.189608	6.76554e-13
UCKL1	0.000375574	-12.2555	0.449806	0.00049201
UGT8	0.0149792	-8.18668	0.594243	0.0159114
UPP1	1.19009e-09	-18.469	0.303954	4.84816e-09
VANGL1	4.67487e-05	-13.1699	0.437234	6.58195e-05
VLDLR	0.014585	-8.35246	0.57264	0.0156036
ZNF274	0.0205219	-8.35514	0.605575	0.0216204
ZNF503	0.0149154	-8.98315	0.570808	0.0159631
